# Supplementary material
Source: PubMed Central journal article supplement (PMC5892363)
Supplement: lic-0007-0104-s01.pdf [file lic-0007-0104-s01.pdf]

## Supplementary Materials

### Patient Selection for Transarterial Chemoembolization in Hepatocellular Carcinoma: Importance of Benefit/Risk Assessment

Fabio Piscaglia, Sadahisa Ogasawara

**Supplemental Table 1.** An overview of trials comparing TACE with control (conservative management or suboptimal therapies) in hepatocellular carcinoma, updated with permission from Lencioni et al [11] copyright © 2012 Karger Publishers, Basel, Switzerland.

| Reference                        | Design | Treatment                  | Patients,<br>n | Key<br>inclusion<br>criteria             | Survival (%) |     |     |            |
|----------------------------------|--------|----------------------------|----------------|------------------------------------------|--------------|-----|-----|------------|
|                                  |        |                            |                |                                          | 1            | 2   | 3   | p<br>value |
| Pelletier et<br>al. 1990<br>[12] | RCT    | TACE                       | 21             | Cirrhosis;                               | 24           | --- | --- | NS         |
|                                  |        | Conservative<br>management | 21             | Okuda<br>stage I-III                     | 31           |     |     |            |
| GETCH<br>1995 [13]               | RCT    | TACE                       | 50             | Cirrhosis;                               | 62           | 38  | --- | NS         |
|                                  |        | Conservative<br>management | 46             | Child-<br>Pugh A;<br>Okuda I-II          | 44           | 26  |     |            |
| Pelletier et<br>al. 1998<br>[14] | RCT    | TACE                       | 37             | Cirrhosis;                               | 51           | 24  | --- | NS         |
|                                  |        | Suboptimal<br>therapy      | 36             | Child-<br>Pugh A<br>and B;<br>Okuda I-II | 55           | 26  |     |            |
| Lo et al.<br>2002 [15]           | RCT    | TACE                       | 40             | Hepatitis                                | 57           | 31  | 26  | 0.002      |
|                                  |        | Conservative<br>management | 39             | B; Okuda<br>I-II                         | 32           | 11  | 3   |            |
| Llovet et<br>al. 2002<br>[16]    | RCT    | TACE                       | 40             | Hepatitis                                | 82           | 63  | 29  | 0.009      |
|                                  |        | Conservative<br>management | 35             | C; Child-<br>Pugh A<br>and B;            | 63           | 27  | 17  |            |

|                          |               |                            |     | BCLC<br>stages B<br>and C;<br>Okuda I-II                       |      |      |     |        |
|--------------------------|---------------|----------------------------|-----|----------------------------------------------------------------|------|------|-----|--------|
| Luo et al.<br>2011 [17]  | Prospective   | TACE                       | 84  | Hepatitis<br>B; portal<br>vein tumor<br>thrombosis             | 30.9 | 9.2  | --- | <0.001 |
|                          |               | Conservative<br>management | 80  |                                                                | 3.8  | 0    |     |        |
| Dai et al.<br>2014 [18]  | Retrospective | TACE                       | 131 | Hepatitis B                                                    | 18.5 | 2.3  | --- | <0.001 |
|                          |               | Conservative<br>management | 156 | C; Child-<br>Pugh A<br>and B;<br>BCLC<br>stages B<br>and C     | 12.1 | 0    |     |        |
| Song et al.<br>2015 [19] | Retrospective | TACE                       | 119 | Hepatitis<br>B; UICC<br>III-IV A;<br>portal vein<br>thrombosis | 43.0 | 23.5 | --- | <0.001 |
|                          |               | Conservative<br>management | 27  |                                                                | 3.7  | 0    |     |        |

BCLC=Barcelona Clinic Liver Cancer; NS=not significant; RCT=randomized controlled trial;  
TACE=transarterial chemoembolization; UICC=Union for International Cancer Control.
